# Supplementary material for: Combination of Coagulation–Flocculation–Decantation and Ozonation Processes for Winery Wastewater Treatment
Source: MDPI journal article supplement (doi:10.3390/ijerph18168882), 2021-08-23
Supplement: s1 [file s1]

# Combination of Coagulation–Flocculation–Decantation and Ozonation Processes for Winery Wastewater Treatment

Nuno Jorge <sup>1,2</sup>, Ana R. Teixeira <sup>2</sup>, Carlos C. Matos <sup>2</sup>, Marco S. Lucas <sup>2</sup> and José A. Peres <sup>2,\*</sup>

<sup>1</sup> Escuela Internacional de Doctorado (EIDO), Campus da Auga, Campus Universitario de Ourense, Universidade de Vigo, As Lagoas, 32004 Ourense, Spain; njorge@uvigo.es

<sup>2</sup> Centro de Química de Vila Real (CQVR), Departamento de Química, Universidade de Trás-os-Montes e Alto Douro (UTAD), Quinta de Prados, 5000-801 Vila Real, Portugal; ritamourateixeira@gmail.com (A.R.T.); cmatos@utad.pt (C.C.M.); mlucas@utad.pt (M.S.L.)

\* Correspondence: jperes@utad.pt

**Table S1**—ANOVA of the regression for turbidity, TSS, COD and TOC. DF - Degrees of freedom; Seq SS - Sum of square; Adj SS - Sum of adjusted squares; Adj MS - Adjusted average squares; F-Value - Fisher ratio.

| Turbidity            |     |        |        |        |         |         | TSS |        |        |        |         |         | COD |        |        |        |         |         | TOC |        |        |        |         |         |
|----------------------|-----|--------|--------|--------|---------|---------|-----|--------|--------|--------|---------|---------|-----|--------|--------|--------|---------|---------|-----|--------|--------|--------|---------|---------|
| Source               | D F | Seq SS | Adj SS | Adj MS | F-Value | P-Value | D F | Seq SS | Adj SS | Adj MS | F-Value | P-Value | D F | Seq SS | Adj SS | Adj MS | F-Value | P-Value | D F | Seq SS | Adj SS | Adj MS | F-Value | P-Value |
| Regression           | 5   | 0.41   | 0.41   | 0.08   | 43.55   | 0.115   | 5   | 0.44   | 0.44   | 0.09   | 9.59    | 0.240   | 5   | 34.84  | 34.84  | 6.97   | 4.26    | 0.352   | 5   | 49.72  | 49.72  | 9.94   | 62.03   | 0.096   |
| Linear regression    | 2   | 0.36   | 0.29   | 0.14   | 75.68   | 0.081   | 2   | 0.40   | 0.32   | 0.16   | 17.45   | 0.167   | 2   | 23.34  | 32.18  | 16.09  | 9.83    | 0.220   | 2   | 15.76  | 37.79  | 18.89  | 117.86  | 0.065   |
| Quadratic regression | 3   | 0.06   | 0.06   | 0.02   | 9.69    | 0.231   | 3   | 0.04   | 0.04   | 0.01   | 1.38    | 0.542   | 3   | 11.50  | 11.50  | 3.83   | 2.34    | 0.440   | 3   | 33.96  | 33.96  | 11.32  | 70.61   | 0.087   |
| Residual Error       | 1   | 0.00   | 0.00   | 0.00   |         |         | 1   | 0.01   | 0.01   | 0.01   |         |         | 1   | 1.64   | 1.64   | 1.64   |         |         | 1   | 0.16   | 0.16   | 70.61  |         |         |
| Total                | 6   | 0.41   |        |        |         |         | 6   | 0.45   |        |        |         |         | 6   | 36.48  |        |        |         |         | 6   | 49.88  |        |        |         |         |

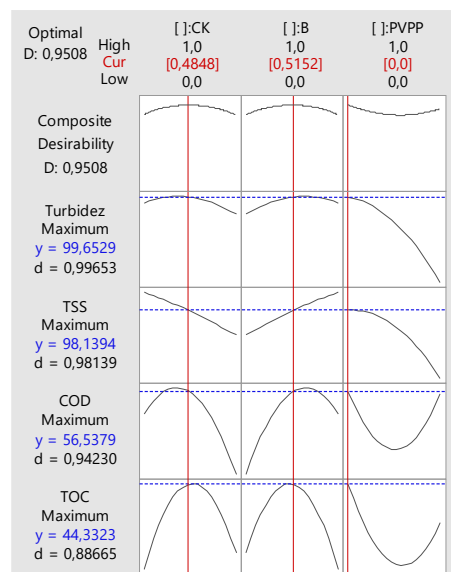

**Figure S1** – Optimization chart. Experimental conditions: 0.48 g/L potassium caseinate, 0.52 g/L bentonite, pH 4.0, temperature 298 K, rapid mix 150 rpm/3 min, slow mix 20 rpm/20 min, sedimentation time 12 h. X<sub>1</sub> – Potassium caseinate, X<sub>2</sub> – Bentonite, X<sub>3</sub> – PVPP.

**Table S2** – Overall results after coagulation-flocculation-decantation process (CFD). Operational conditions: 0.48 g/L potassium caseinate, 0.52 g/L bentonite, pH 4, temperature 298K, rapid mix 150rpm/3min, slow mix 20rpm/20min, sedimentation time 12h.

| Time<br>min | Turbidity |      | TSS  |      | TOC    |      | COD                  |      | Total polyphenols |      |
|-------------|-----------|------|------|------|--------|------|----------------------|------|-------------------|------|
|             | NTU       | %    | mg/L | %    | mg C/L | %    | mg O <sub>2</sub> /L | %    | mg gallic acid/ L | %    |
| 0           | 1040      |      | 2430 |      | 1962   |      | 9432                 |      | 123               |      |
| 60          | 324       | 68.8 | 766  | 68.5 | 1682   | 14.3 | 7794                 | 17.4 | 38                | 69.1 |
| 120         | 263       | 74.7 | 493  | 79.7 | 1450   | 26.1 | 7157                 | 24.1 | 30                | 75.6 |
| 240         | 106       | 89.8 | 284  | 88.3 | 1423   | 27.5 | 6719                 | 28.8 | 27                | 78.0 |
| 360         | 42.3      | 95.9 | 127  | 94.8 | 1354   | 31.0 | 6682                 | 29.2 | 23                | 81.3 |
| 480         | 32.1      | 96.9 | 91   | 96.3 | 1237   | 37.0 | 6369                 | 32.5 | 18                | 85.4 |
| 600         | 28.8      | 97.2 | 83   | 96.6 | 1102   | 43.8 | 5719                 | 39.4 | 17                | 86.2 |
| 720         | 17.6      | 98.3 | 58   | 97.6 | 1087   | 44.6 | 4907                 | 48.0 | 15                | 87.8 |

**Table S3** – Evaluation of TOC removal through the ozonation process at different pH values (4.0 – 11). Ozonation experimental conditions: [Fe<sup>2+</sup>] = 1.0 mM, ozone flow rate 5 mg/min, air flow 1.0 L/min, agitation 350 rpm, time 600min, radiation UV-C mercury lamp (254 nm).

| O <sub>3</sub> /Fe <sup>2+</sup> /UV-C |               |      |               |      |               |      |                |      |
|----------------------------------------|---------------|------|---------------|------|---------------|------|----------------|------|
| Time                                   | pH 4.0<br>TOC |      | pH 7.0<br>TOC |      | pH 9.0<br>TOC |      | pH 11.0<br>TOC |      |
| min                                    | mg C/L        | %    | mg C/L        | %    | mg C/L        | %    | mg C/L         | %    |
| 0                                      | 1962          |      | 1962          |      | 1962          |      | 1962           |      |
| 120                                    | 1425          | 27.4 | 1870          | 4.7  | 1550          | 21.0 | 1495           | 23.8 |
| 240                                    | 1253          | 36.1 | 1403          | 28.5 | 1428          | 27.2 | 1401           | 28.6 |
| 360                                    | 949           | 51.7 | 1349          | 31.2 | 1343          | 31.5 | 1229           | 37.4 |
| 480                                    | 801           | 59.2 | 1215          | 38.1 | 1052          | 46.4 | 1101           | 43.9 |
| 600                                    | 722           | 63.2 | 1131          | 42.4 | 927           | 52.7 | 988            | 49.6 |

  

| O <sub>3</sub> /UV-C |               |      |               |      |               |      |                |      |
|----------------------|---------------|------|---------------|------|---------------|------|----------------|------|
| Time                 | pH 4.0<br>TOC |      | pH 7.0<br>TOC |      | pH 9.0<br>TOC |      | pH 11.0<br>TOC |      |
| min                  | mg C/L        | %    | mg C/L        | %    | mg C/L        | %    | mg C/L         | %    |
| 0                    | 1962          |      | 1962          |      | 1962          |      | 1962           |      |
| 120                  | 1522          | 22.4 | 1350          | 31.2 | 1386          | 29.4 | 1847           | 5.9  |
| 240                  | 1094          | 44.2 | 1295          | 34.0 | 1386          | 29.4 | 1698           | 13.5 |
| 360                  | 1212          | 38.2 | 1257          | 35.9 | 1308          | 33.3 | 1405           | 28.4 |
| 480                  | 1061          | 45.9 | 1228          | 37.4 | 1246          | 36.5 | 1264           | 35.6 |
| 600                  | 834           | 57.5 | 1224          | 37.6 | 1246          | 36.5 | 1217           | 38.0 |

  

| O <sub>3</sub> |               |      |               |      |               |      |                |      |
|----------------|---------------|------|---------------|------|---------------|------|----------------|------|
| Time           | pH 4.0<br>TOC |      | pH 7.0<br>TOC |      | pH 9.0<br>TOC |      | pH 11.0<br>TOC |      |
| min            | mg C/L        | %    | mg C/L        | %    | mg C/L        | %    | mg C/L         | %    |
| 0              | 1962          |      | 1962          |      | 1962          |      | 1962           |      |
| 120            | 1417          | 27.8 | 1610          | 17.9 | 1810          | 7.7  | 1473           | 24.9 |
| 240            | 1409          | 28.2 | 1542          | 21.4 | 1776          | 9.5  | 1601           | 18.4 |
| 360            | 1403          | 28.5 | 1542          | 21.4 | 1776          | 9.5  | 1501           | 23.5 |
| 480            | 1336          | 31.9 | 1537          | 21.7 | 1776          | 9.5  | 1465           | 25.3 |
| 600            | 1336          | 31.9 | 1400          | 28.6 | 1743          | 11.2 | 1259           | 35.8 |

  

| UV-C |               |      |               |     |               |     |                |     |
|------|---------------|------|---------------|-----|---------------|-----|----------------|-----|
| Time | pH 4.0<br>TOC |      | pH 7.0<br>TOC |     | pH 9.0<br>TOC |     | pH 11.0<br>TOC |     |
| min  | mg C/L        | %    | mg C/L        | %   | mg C/L        | %   | mg C/L         | %   |
| 0    | 1962          |      | 1962          |     | 1962          |     | 1962           |     |
| 120  | 1338          | 31.8 | 1962          | 0.0 | 1962          | 0.0 | 1962           | 0.0 |
| 240  | 1338          | 31.8 | 1962          | 0.0 | 1962          | 0.0 | 1881           | 4.1 |
| 360  | 1338          | 31.8 | 1962          | 0.0 | 1962          | 0.0 | 1881           | 4.1 |
| 480  | 1313          | 33.1 | 1945          | 0.9 | 1962          | 0.0 | 1881           | 4.1 |
| 600  | 1313          | 33.1 | 1945          | 0.9 | 1962          | 0.0 | 1881           | 4.1 |

**Table S4** – Evaluation of TOC removal through the ozonation process at different Fe<sup>2+</sup> concentrations (0.5 – 2.0 mM). Ozonation experimental conditions: pH = 4.0, ozone flow rate 5 mg/min, air flow 1.0 L/min, agitation 350 rpm, time 600min, radiation UV-C mercury lamp (254 nm).

| Time                    |        |      | UV-C/Fe <sup>2+</sup> /O <sub>3</sub> |      |                         |      |                      |      | Blanks         |      |        |      |
|-------------------------|--------|------|---------------------------------------|------|-------------------------|------|----------------------|------|----------------|------|--------|------|
| 0.5 mM Fe <sup>2+</sup> |        |      | 1.0 mM Fe <sup>2+</sup>               |      | 2.0 mM Fe <sup>2+</sup> |      | O <sub>3</sub> /UV-C |      | O <sub>3</sub> |      | UV-C   |      |
| TOC                     |        |      | TOC                                   |      | TOC                     |      | TOC                  |      | TOC            |      | TOC    |      |
| min                     | mg C/L | %    | mg C/L                                | %    | mg C/L                  | %    | mg C/L               | %    | mg C/L         | %    | mg C/L | %    |
| 0                       | 1962   |      | 1962                                  |      | 1962                    |      | 1962                 |      | 1962           |      | 1962   |      |
| 120                     | 1241   | 36.7 | 1425                                  | 27.4 | 1258                    | 35.9 | 1522                 | 22.4 | 1417           | 27.8 | 1338   | 31.8 |
| 240                     | 1061   | 45.9 | 1253                                  | 36.1 | 1038                    | 47.1 | 1094                 | 44.2 | 1409           | 28.2 | 1338   | 31.8 |
| 360                     | 962    | 51.0 | 949                                   | 51.7 | 827                     | 57.9 | 1212                 | 38.2 | 1403           | 28.5 | 1338   | 31.8 |
| 480                     | 872    | 55.5 | 801                                   | 59.2 | 760                     | 61.3 | 1061                 | 45.9 | 1336           | 31.9 | 1313   | 33.1 |
| 600                     | 804    | 59.0 | 722                                   | 63.2 | 654                     | 66.7 | 834                  | 57.5 | 1336           | 31.9 | 1313   | 33.1 |

**Table S5** – Determination of ozone consumption throughout the ozonation process. Ozonation experimental conditions: pH = 4.0, [Fe<sup>2+</sup>] = 1.0 mM, ozone flow rate 5 mg/min, air flow 1.0 L/min, agitation 350 rpm, time 600 min, radiation UV-C mercury lamp (254 nm).

| Time | Injected ozone         | Dissolved ozone        | Ozone lost             |
|------|------------------------|------------------------|------------------------|
| min  | mg O <sub>3</sub> /min | mg O <sub>3</sub> /min | mg O <sub>3</sub> /min |
| 0    | 5.000                  | 0.000                  | 0.000                  |
| 120  | 5.000                  | 0.165                  | 4.835                  |
| 240  | 5.000                  | 0.330                  | 4.670                  |
| 360  | 5.000                  | 0.190                  | 4.810                  |
| 480  | 5.000                  | 0.270                  | 4.730                  |
| 600  | 5.000                  | 0.360                  | 4.640                  |

**Table S6** – Overall results after ozonation (O<sub>3</sub>), coagulation-flocculation-decantation (CFD) and combined O<sub>3</sub>/CFD and CFD/O<sub>3</sub> treatments. CFD experimental conditions: 0.48 g/L potassium caseinate, 0.52 g/L bentonite, pH 4, temperature 298 K, rapid mix 150 rpm/3 min, slow mix 20 rpm/20 min, sedimentation time 12h. Ozonation experimental conditions: pH 4.0, [Fe<sup>2+</sup>] = 1.0 mM, ozone flow rate 5 mg/min, air flow 1.0 L/min, agitation 350 rpm, time 600 min, radiation UV-C mercury lamp (254 nm).

| Proce<br>ss   |                         | TOC       |      | COD                         |      | BOD <sub>5</sub>            |      | BOD <sub>5</sub> /C<br>OD | Turbidi<br>ty | Remov<br>al | TSS      | Remov<br>al | Total<br>polyphen<br>ols | Remov<br>al |
|---------------|-------------------------|-----------|------|-----------------------------|------|-----------------------------|------|---------------------------|---------------|-------------|----------|-------------|--------------------------|-------------|
|               |                         | mg<br>C/L | %    | mg<br>O <sub>2</sub> /<br>L | %    | mg<br>O <sub>2</sub> /<br>L | %    |                           | NTU           | %           | mg/<br>L | %           | mg/L                     | %           |
| Proce<br>ss 1 | Blanc                   | 1962      |      | 943<br>2                    |      | 261<br>1                    |      | 0.28                      | 1040          |             | 243<br>0 |             | 123                      |             |
|               | O <sub>3</sub>          | 722       | 63.2 | 441<br>9                    | 53.1 | 126<br>5                    | 51.6 | 0.29                      | 359           | 65.5        | 807      | 66.8        | 6.0                      | 95.1        |
|               | O <sub>3</sub> /CF<br>D | 665       | 66.1 | 316<br>9                    | 66.4 | 909                         | 65.2 | 0.29                      | 1.2           | 99.9        | 41       | 98.3        | 5.0                      | 95.9        |
| Proce<br>ss 2 | CFD                     | 1087      | 44.6 | 490<br>7                    | 48.0 | 158<br>0                    | 39.5 | 0.32                      | 17.6          | 98.3        | 58       | 97.6        | 23.1                     | 81.2        |
|               | CFD/<br>O <sub>3</sub>  | 676       | 65.5 | 370<br>7                    | 60.7 | 150<br>0                    | 42.5 | 0.40                      | 7.2           | 99.3        | 41       | 98.3        | 0.9                      | 99.3        |

**Table S7** – Analysis of seed phytotoxicity after wastewater treatment, by evaluation of germination percentage (G), relative seed germination (RSG), relative root growth (RRG) and germination index (GI). CFD experimental conditions: 0.48 g/L potassium caseinate, 0.52 g/L bentonite, pH 4.0, temperature 298 K, rapid mix 150 rpm/3 min, slow mix 20 rpm/20 min, sedimentation time 12h. Ozonation experimental conditions: pH 4.0,  $[\text{Fe}^{2+}] = 1.0 \text{ mM}$ , ozone flow rate 5 mg/min, air flow 1.0 L/min, agitation 350 rpm, time 600 min, radiation UV-C mercury lamp (254 nm).  $\text{GI} \leq 50\%$  (high concentration of phytotoxic substances),  $50\% < \text{GI} < 80\%$  (moderated presence of phytotoxic substances),  $\text{GI} \geq 80\%$  (there are no phytotoxic substances, or they exist in very small dosages).

| Processes | Treatments              | Seed     | Root length<br>mm | G<br>% | RSG<br>% | RRG<br>% | GI<br>% |
|-----------|-------------------------|----------|-------------------|--------|----------|----------|---------|
| Process 1 | Pure water              | Onion    | 8.73              | 69     |          |          |         |
|           |                         | Cucumber | 45.85             | 97     |          |          |         |
|           |                         | Lettuce  | 3.80              | 51     |          |          |         |
|           |                         | Corn     | 74.32             | 80     |          |          |         |
|           | Raw WW                  | Onion    | 12.66             | 82     | 119      | 145      | 173     |
|           |                         | Cucumber | 32.50             | 70     | 72       | 71       | 51      |
|           |                         | Lettuce  | 0.00              | 0      | 0        | 0        | 0       |
|           |                         | Corn     | 116.94            | 93     | 117      | 157      | 184     |
|           | $\text{O}_3$            | Onion    | 13.88             | 91     | 132      | 159      | 210     |
|           |                         | Cucumber | 57.88             | 87     | 90       | 126      | 113     |
|           |                         | Lettuce  | 13.03             | 44     | 87       | 343      | 298     |
|           |                         | Corn     | 68.37             | 100    | 125      | 92       | 115     |
|           | $\text{O}_3/\text{CFD}$ | Onion    | 6.65              | 24     | 35       | 76       | 27      |
|           |                         | Cucumber | 58.01             | 83     | 86       | 127      | 109     |
|           |                         | Lettuce  | 5.13              | 33     | 65       | 135      | 88      |
|           |                         | Corn     | 212.22            | 100    | 125      | 286      | 357     |
| Process 2 | CFD                     | Onion    | 7.95              | 71     | 103      | 91       | 94      |
|           |                         | Cucumber | 34.86             | 90     | 93       | 76       | 71      |
|           |                         | Lettuce  | 0.00              | 0      | 0        | 0        | 0       |
|           |                         | Corn     | 100.04            | 93     | 117      | 135      | 157     |
|           | CFD/ $\text{O}_3$       | Onion    | 10.40             | 60     | 87       | 119      | 104     |
|           |                         | Cucumber | 59.83             | 87     | 90       | 130      | 117     |
|           |                         | Lettuce  | 10.37             | 47     | 91       | 273      | 249     |
|           |                         | Corn     | 89.63             | 87     | 108      | 121      | 131     |

**Table S8** – Analysis of phenolic composition after ozonation (O<sub>3</sub>), coagulation-flocculation-decantation (CFD) and combined O<sub>3</sub>/CFD and CFD/O<sub>3</sub> treatments. CFD experimental conditions: 0.48 g/L potassium caseinate, 0.52 g/L bentonite, pH 4.0, temperature 298 K, rapid mix 150 rpm/3 min, slow mix 20 rpm/20 min, sedimentation time 12 h. Ozonation experimental conditions: pH 4.0, [Fe<sup>2+</sup>] = 1.0 mM, ozone flow rate 5 mg/min, air flow 1.0 L/min, agitation 350 rpm, time 600 min, radiation UV-C mercury lamp (254 nm).

| Process   | Color intensity     | hue  | Total phenols     |           | Non-flavonoids    |           | Flavonoids        |           | Total anthocyanins |           | Colored anthocyanins |           | Total pigments |           | Total tannins |           |
|-----------|---------------------|------|-------------------|-----------|-------------------|-----------|-------------------|-----------|--------------------|-----------|----------------------|-----------|----------------|-----------|---------------|-----------|
|           |                     |      | mg gallic acid/ L | % removal | mg gallic acid/ L | % removal | mg gallic acid/ L | % removal | mg/ L              | % removal | mg/ L                | % removal | mg/ L          | % removal | mg/ L         | % removal |
| Process 1 | Blanc               | 0.95 | 1.04              | 157       |                   | 115       |                   | 41        |                    | 4         |                      | 0.07      |                | 0.45      |               | 87.0      |
|           | O <sub>3</sub>      | 0.37 | 1.76              | 157       | 0.0               | 115       | 0.0               | 41        | 0.0                | 2         | 50.0                 | 0.05      | 28.6           | 0.05      | 88.9          | 19.3 77.8 |
|           | O <sub>3</sub> /CFD | 0.23 | 1.54              | 149       | 5.1               | 115       | 0.0               | 35        | 14.6               | 2         | 50.0                 | 0.00      | 100            | 0.10      | 77.8          | 0.0 100   |
| Process 2 | CFD                 | 0.28 | 1.30              | 154       | 1.9               | 112       | 2.6               | 41        | 0.0                | 3         | 25.0                 | 0.04      | 42.9           | 0.10      | 77.8          | 29.0 66.7 |
|           | CFD/O <sub>3</sub>  | 0.17 | 1.89              | 152       | 3.2               | 112       | 2.6               | 38        | 7.3                | 0         | 100.0                | 0.00      | 100            | 0.00      | 100           | 0.0 100   |

**Table S9** – Analysis of chromatic characteristics (CIELab) after ozonation (O<sub>3</sub>), coagulation-flocculation-decantation (CFD) and combined O<sub>3</sub> → CFD and CFD → O<sub>3</sub> treatments. CFD experimental conditions: 0.48 g/L potassium caseinate, 0.52 g/L bentonite, pH 4, temperature 298 K, rapid mix 150 rpm/3 min, slow mix 20 rpm/ 20 min, sedimentation time 12h. Ozonation experimental conditions: pH 4.0, [Fe<sup>2+</sup>] = 1.0 mM, ozone flow rate 5 mg/min, air flow 1.0 L/min, agitation 350 rpm, time 600 min, radiation UV-C mercury lamp (254 nm).

| Process   |                     | L*(%)  | a*    | b*    | ΔL*    | Δa*   | Δb*   | ΔE <sub>ab</sub> * |
|-----------|---------------------|--------|-------|-------|--------|-------|-------|--------------------|
| Process 1 | Blanc               | 0.00   | 1.78  | 4.11  |        |       |       |                    |
|           | O <sub>3</sub>      | 21.66  | 2.80  | 10.16 | 21.66  | 1.02  | 6.05  | 22.51              |
|           | O <sub>3</sub> /CFD | 99.67  | -0.11 | 1.02  | 99.67  | -1.89 | -3.09 | 99.74              |
| Process 2 | CFD                 | 100.00 | -0.05 | 0.50  | 100.00 | -1.83 | -3.61 | 100.00             |
|           | CFD/O <sub>3</sub>  | 100.00 | -0.12 | 0.82  | 100.00 | -1.90 | -3.29 | 100.00             |
